# Supplementary material for: Monitoring Microcirculatory Blood Flow with a New Sublingual Tonometer in a Porcine Model of Hemorrhagic Shock
Source: Hindawi journal article supplement (doi:10.1155/2015/847152), 2015-01-01

Figure S1.

A

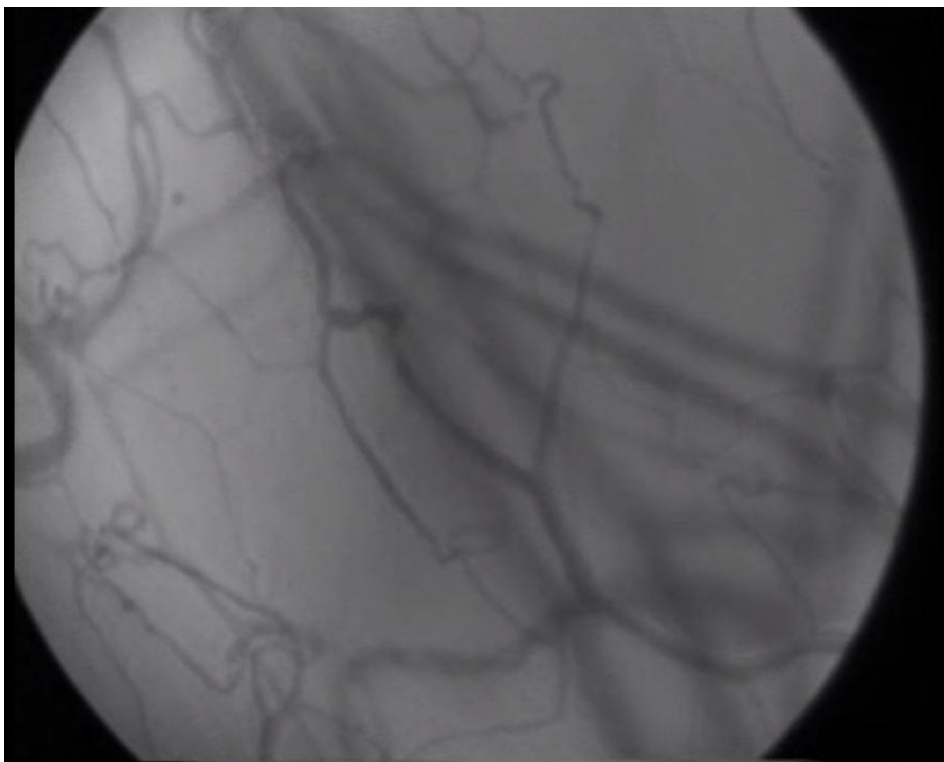

B

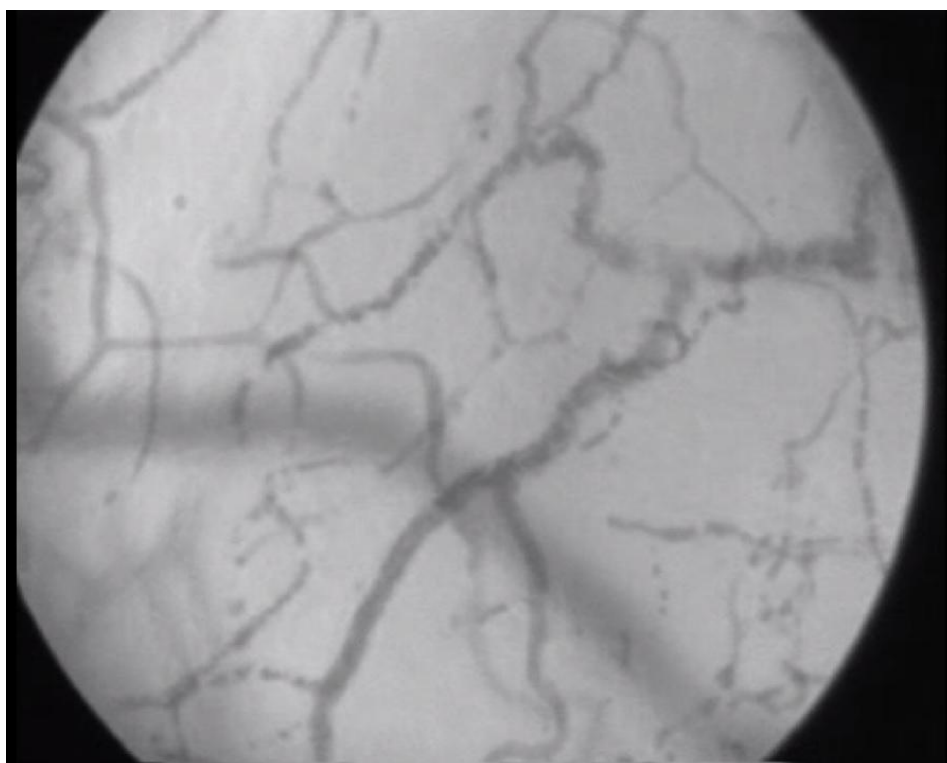

C

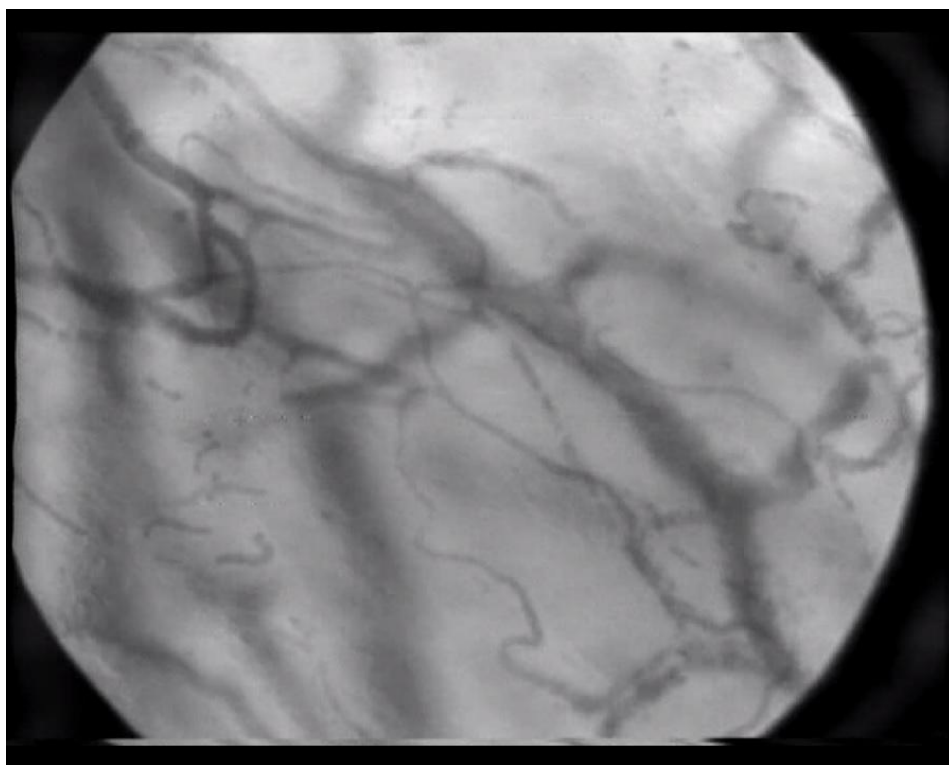

Supplement: f1 [file 847152.f1.pdf]
